# Supplementary material for: Transplant outcomes after CPX-351 vs 7 + 3 in older adults with newly diagnosed high-risk and/or secondary AML
Source: PubMed Central journal article supplement — Blood Adv. 2022 Aug 29;6(17):4989–93. doi: 10.1182/bloodadvances.2021006468 (PMC9631647; doi:10.1182/bloodadvances.2021006468), 2022-08-29

## Supplemental Appendix

### Supplemental Figure S1. Cumulative Incidence of GVHD.

(A) Cumulative incidence of acute GVHD. (B) Cumulative incidence of chronic GVHD. Abbreviations: alloHCT, allogeneic hematopoietic cell transplantation; CI, confidence interval; GVHD, graft-versus-host disease; HR, hazard ratio.

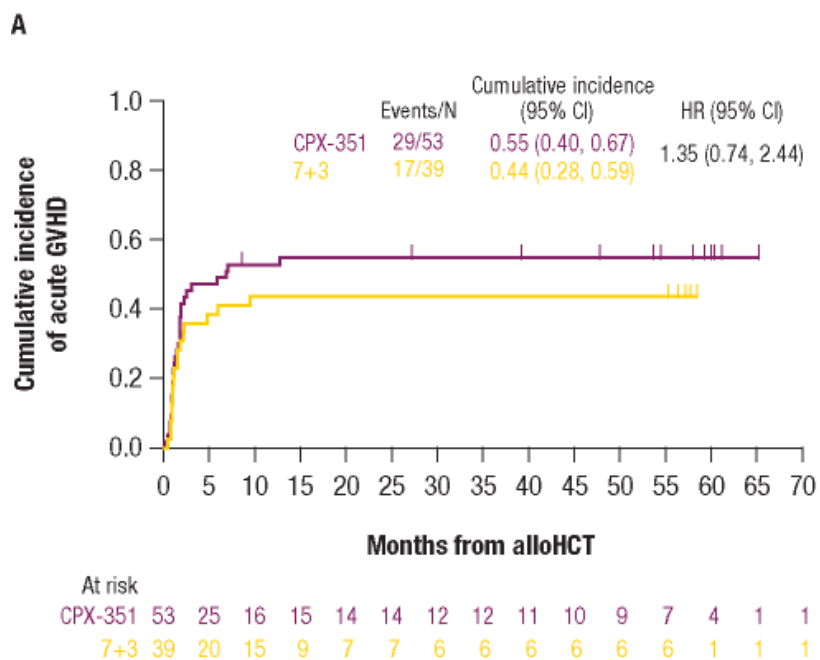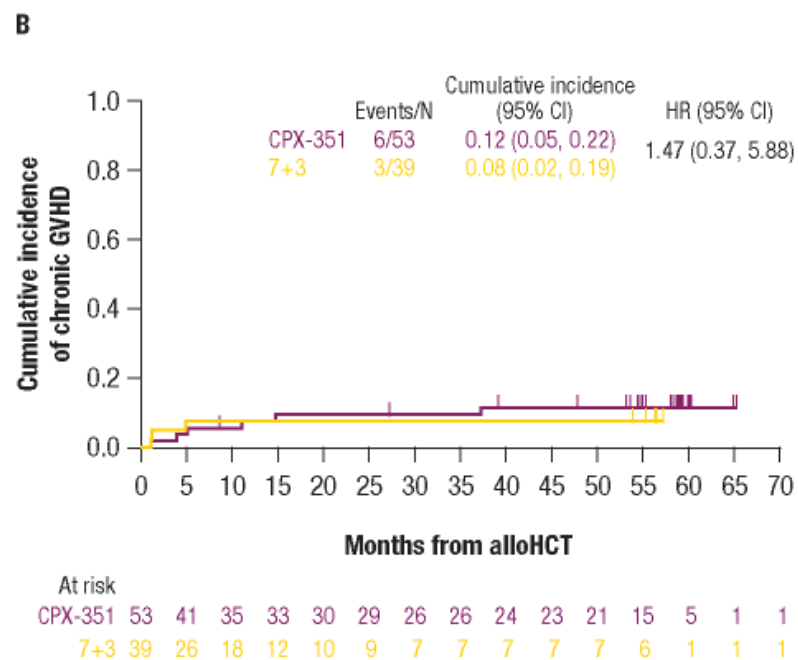

Supplement: advancesADV2021006468-suppl1.pdf [file advancesADV2021006468-suppl1.pdf]
